# Supplementary material
Source: publisher site journal article supplement (https://www.dovepress.com/article/489603)
Supplement: Supplementary file 1 [file get_supplementary_file.php]

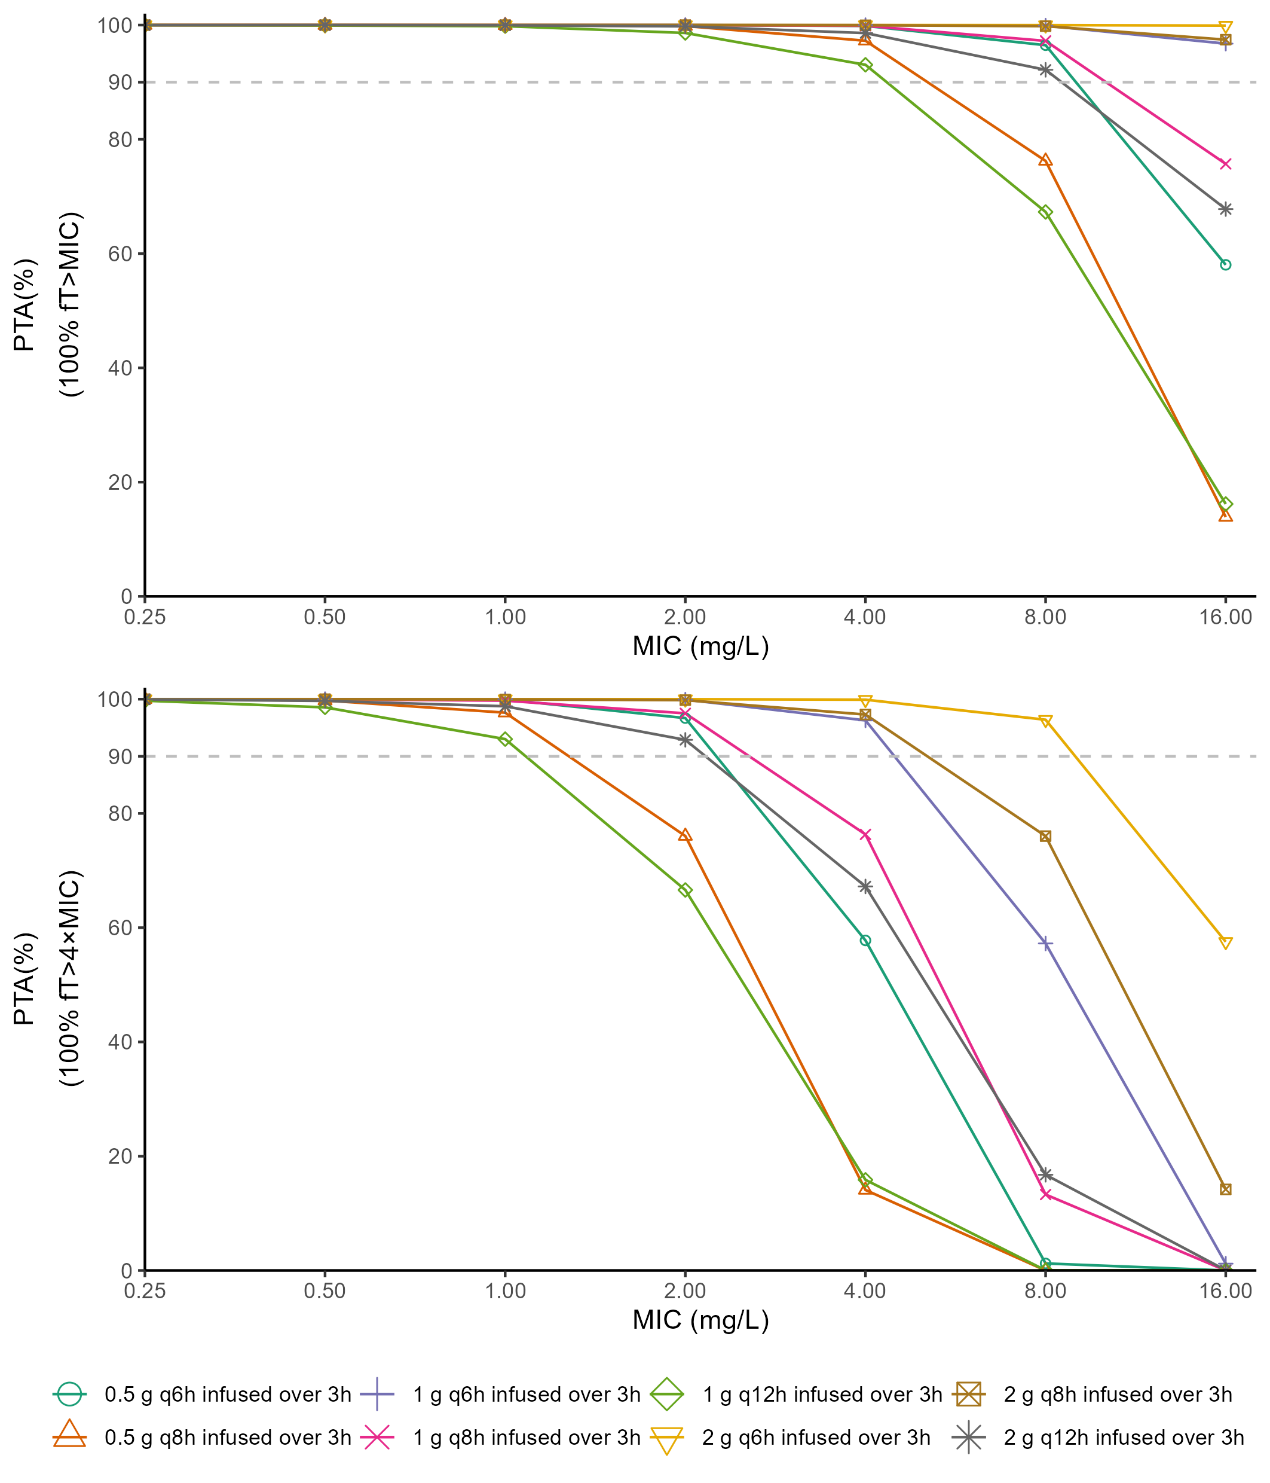


**Figure S1.** PTA versus MIC profiles for different meropenem dosing regimens (3h infusion) in critically ill patients (CLCR=10 mL/min) receiving a CRRT dose of 25 mL/h/kg based on the PK/PD targets of 100% *f*T>MIC (upper panel) and 100% *f*T>4×MIC (lower panel). The dashed horizontal line represents a PTA of 90%.


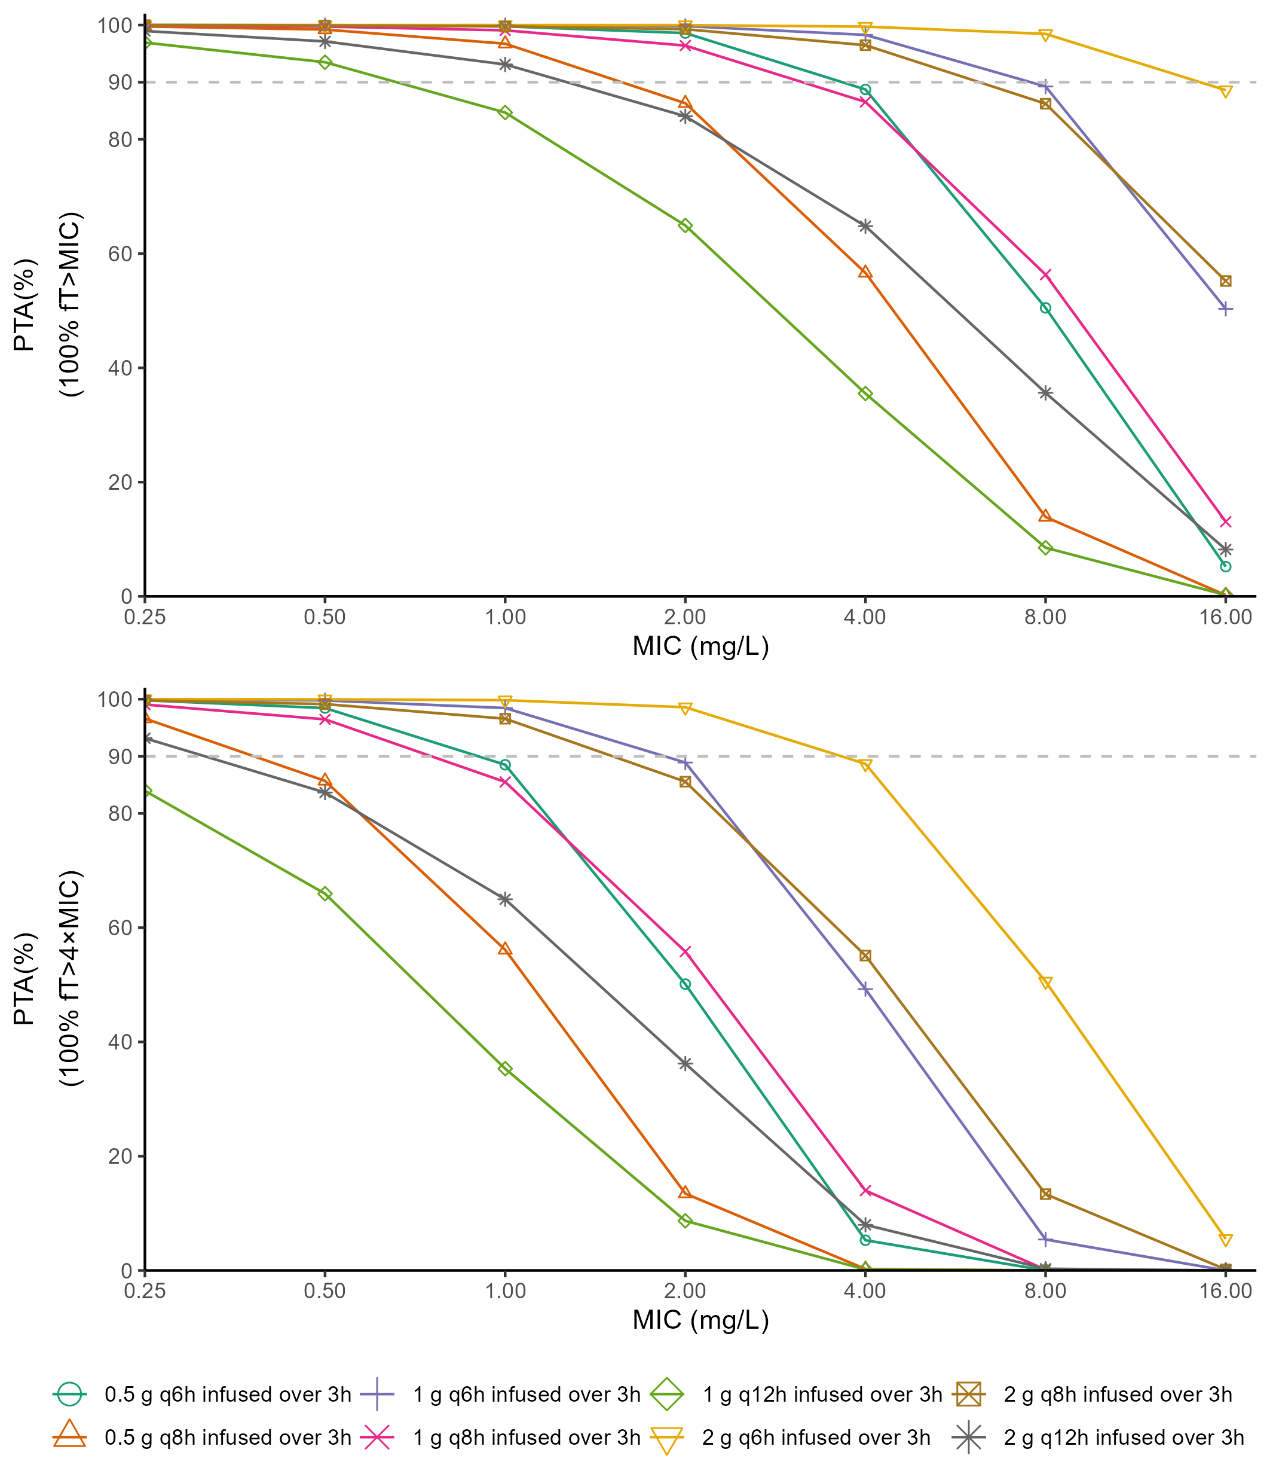


**Figure S2.** PTA versus MIC profiles for different meropenem dosing regimens (3h infusion) in critically ill patients (CLCR=50 mL/min) receiving a CRRT dose of 25 mL/h/kg based on the PK/PD targets of 100% *f*T>MIC (upper panel) and 100% *f*T>4×MIC (lower panel). The dashed horizontal line represents a PTA of 90%.
